# Supplementary material
Source: publisher figshare collection journal article supplement (https://acs.figshare.com/ndownloader/files/7402201)
Supplement: Supplementary file 1 [file 7402201]

# **Green to Red Electrochromic Fe(II) Metallo-supramolecular Polyelectrolytes Self-Assembled from Fluorescent 2,6-Bis(2-pyridyl)pyrimidine bithiophene**

Sandesh Pai,<sup>a</sup> Michael Moos,<sup>b</sup> Maximilian H. Schreck,<sup>b</sup> Christoph Lambert,<sup>b</sup>  
and Dirk G. Kurth<sup>a,\*</sup>

<sup>a</sup>Julius-Maximilians-Universität Würzburg, Chemische Technologie der  
Materialsynthese, Röntgenring 11, D-97070 Würzburg, Germany

<sup>b</sup>Center for Nanosystems Chemistry, Institut für Organische Chemie, Universität  
Würzburg, Am Hubland, D-97074 Würzburg

Phone: +49-(0)931-31-82631; Fax: +49-(0)931-31-82109;

\*E-Mail: [dirk.kurth@matsyn.uni-wuerzburg.de](mailto:dirk.kurth@matsyn.uni-wuerzburg.de)

## **Supporting Information**

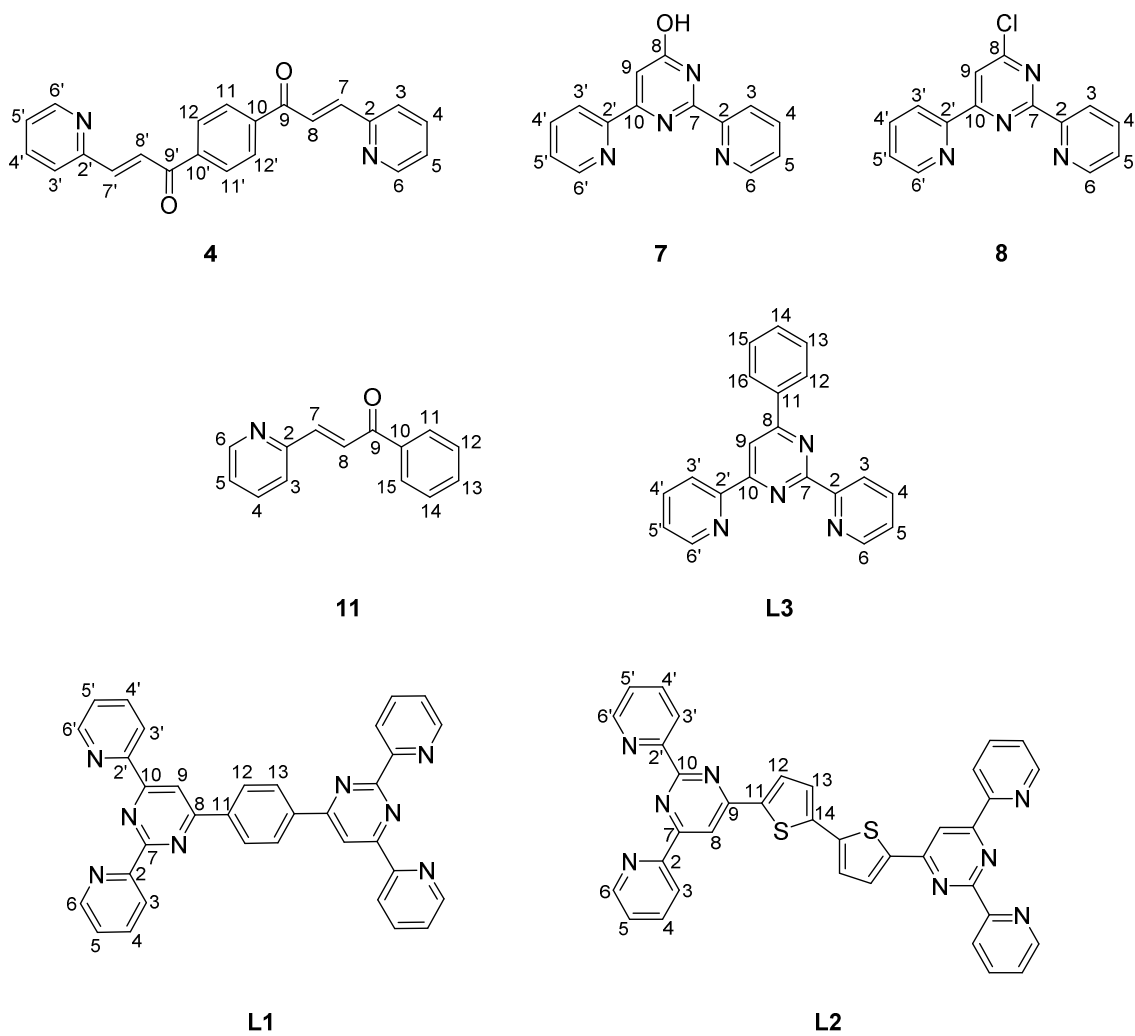

**Scheme S1.** Numbering scheme for intermediates and ligands **L1-L3**.

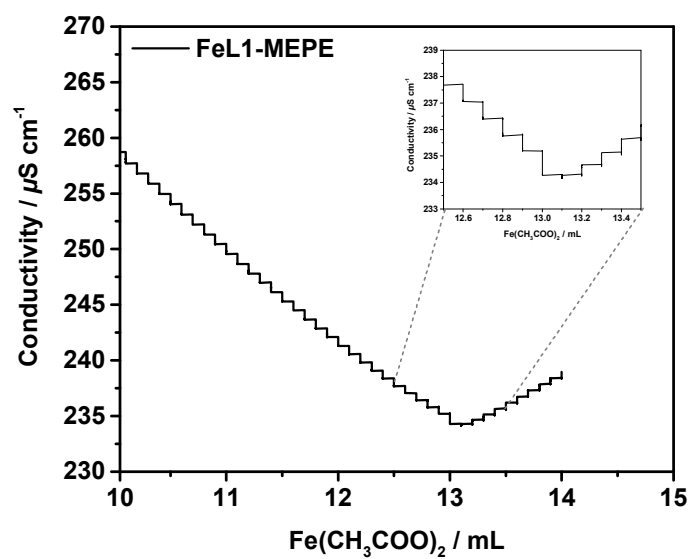

**Figure S1.** Synthesis of **FeL1-MEPE** by conductometric titration of a solution of ligand (**L1**) in 75% acetic acid ( $c = 9$  mM) with Fe(II) acetate solution ( $c = 18$  mM) in 75% acetic acid at 25 °C, under argon atmosphere and (inset) conductivity minimum at stoichiometry,  $y = [M]/[L]$ .

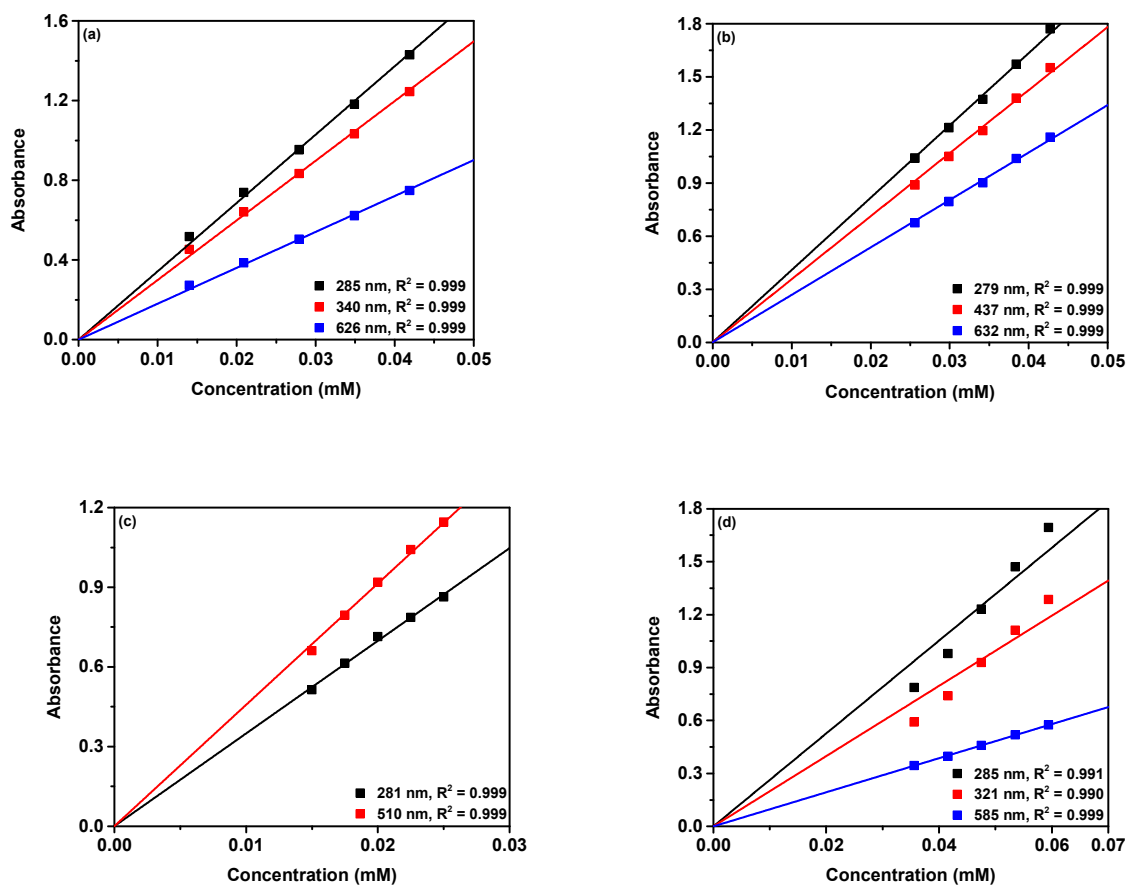

**Figure S2.** Linear correlation between the concentration and the characteristic peaks of **FeL1-MEPE** (a) in water, **FeL2-MEPE** (b) in ethanol, **CoL2-MEPE** (c) in water and **FL3-MC** (d) in water.

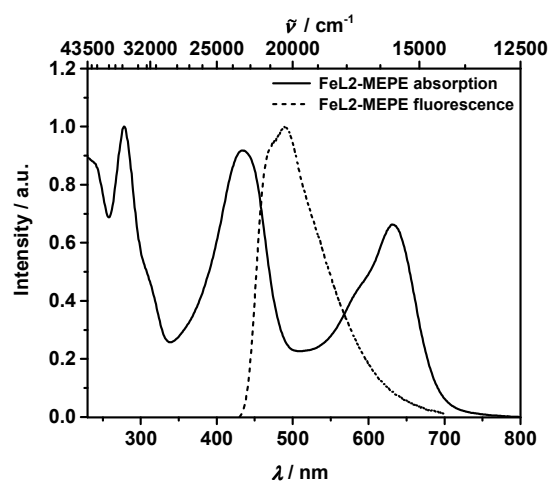

**Figure S3.** Normalized absorption (solid line) and fluorescence (dotted line) spectrum of FeL2-MEPE in MeOH ( $\lambda_{\text{exc}} = 420 \text{ nm}$ ).

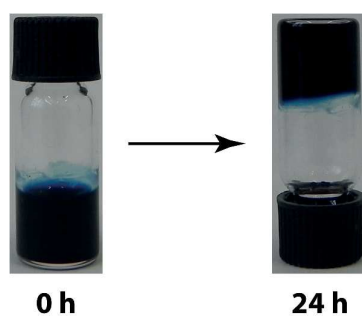

**Figure S4.** A photographic image of a solution of FeL1-MEPE in water ( $c = 8 \text{ mM}$ ) at  $t = 0 \text{ h}$ , and its formation of viscous gel at ca.  $t = 24 \text{ h}$ , upon incubation at  $20 \text{ }^{\circ}\text{C}$ . Upon turning upside down the viscous gel starts flowing slowly after few minutes ( $\sim 2 - 3 \text{ min}$ ).

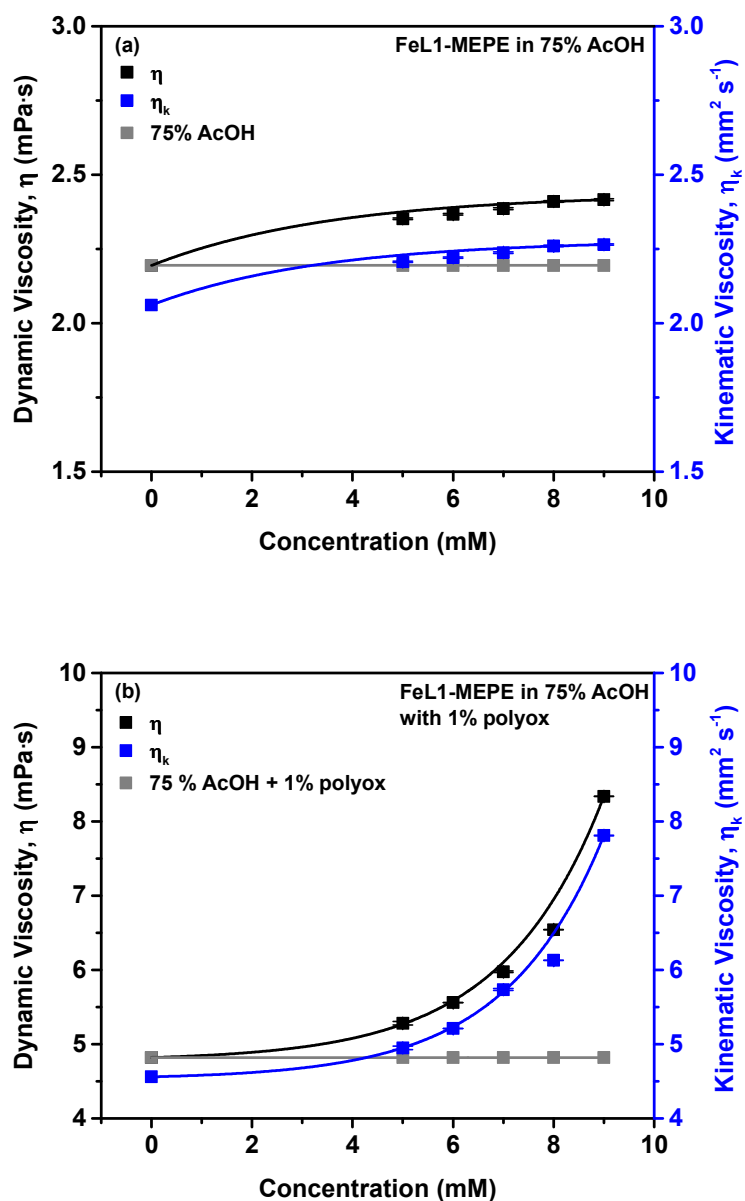

**Figure S5.** (a) Dynamic and kinematic viscosity of **FeL1-MEPE** in 75% acetic acid as a function of concentration. (b) The effect of water soluble Polyox™ WSR N-80 on the viscosity of **FeL1-MEPE** in 75% acetic acid. The viscosity of 75% acetic acid, and 75% acetic acid with 1% Polyox™ WSR N-80 is shown in grey. The viscosity data points are an average of three independent measurements performed at 20 °C.

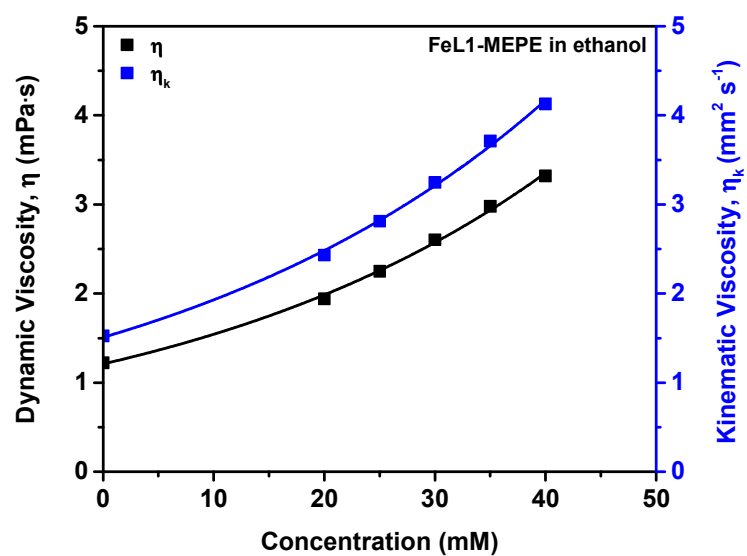

**Figure S6.** (a) Dynamic and kinematic viscosity of **FeL1-MEPE** in ethanol as a function of concentration. The data on Y-axis at  $c = 0$  mM represents the viscosity of ethanol.

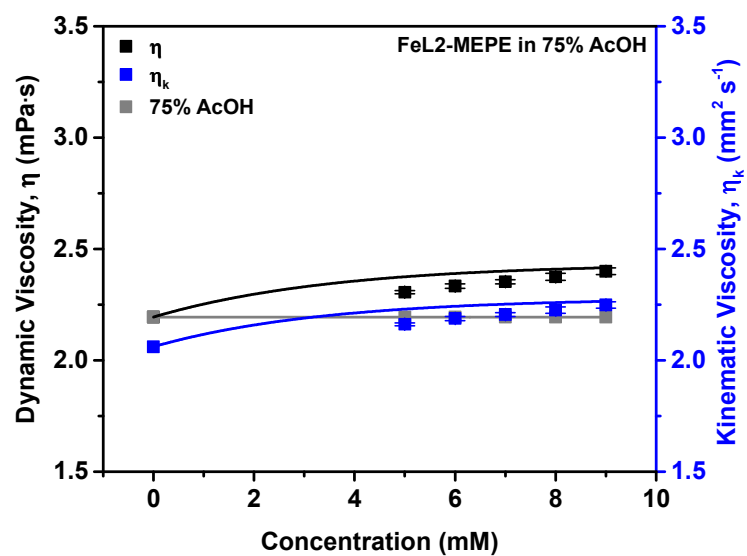

**Figure S7.** Dynamic and kinematic viscosity of **FeL2-MEPE** in 75% acetic acid as a function of concentration. The viscosity of 75% acetic acid is shown in grey. The viscosity data points are an average of three independent measurements performed at 20 °C.



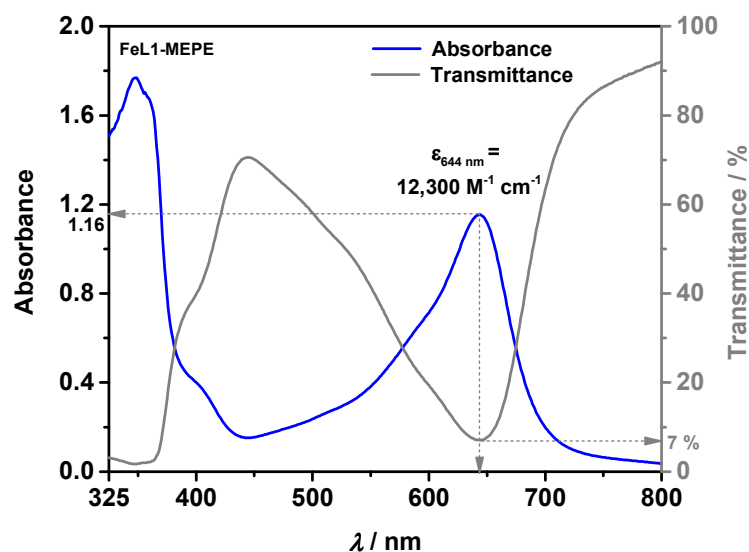

**Figure S8.** Absorbance and transmittance spectra of **FeL1-MEPE** film on ITO-coated glass (dimension: 1 cm x 2.5 cm) prepared by dip coating using a solution concentration of 30 mM in water, at a withdrawing speed of 100 mm min<sup>-1</sup>. The molar absorptivity,  $\epsilon$  of **FeL1-MEPE** amounts to 12,300 M<sup>-1</sup>·cm<sup>-1</sup>.

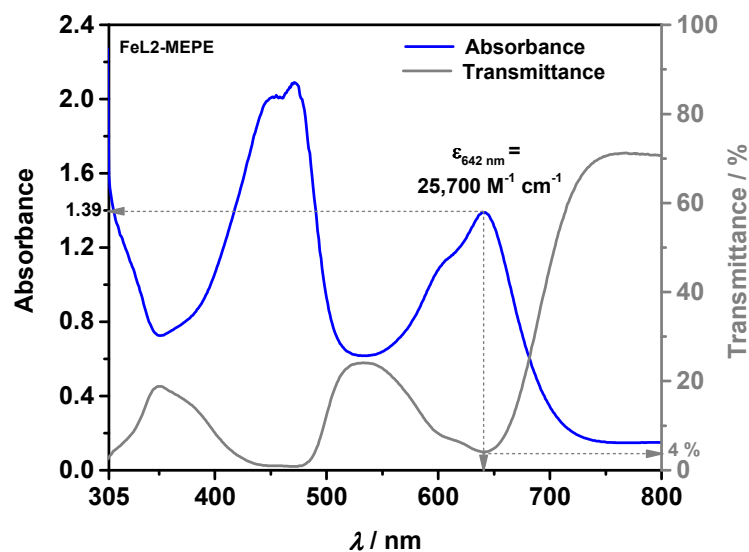

**Figure S9.** Absorbance and transmittance spectra of **FeL2-MEPE** film on ITO-coated glass (dimension: 1 cm x 2.5 cm) prepared by dip coating using a solution concentration of 14 mM in ethanol, at a withdrawing speed of 100 mm min<sup>-1</sup>. The molar absorptivity,  $\epsilon$  of **FeL2-MEPE** amounts to 25,700 M<sup>-1</sup>·cm<sup>-1</sup>.

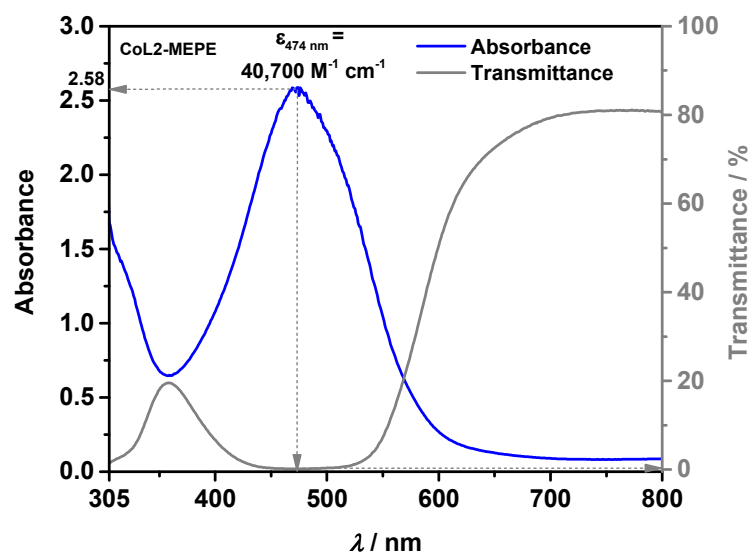

**Figure S10.** Absorbance and transmittance spectra of **CoL2-MEPE** film on ITO-coated glass (dimension: 1 cm x 2.5 cm) prepared by dip coating using a solution concentration of 14 mM in water, at a withdrawing speed of 100 mm min<sup>-1</sup>. The molar absorptivity,  $\epsilon$  of **CoL2-MEPE** amounts to 40,700 M<sup>-1</sup>·cm<sup>-1</sup>.

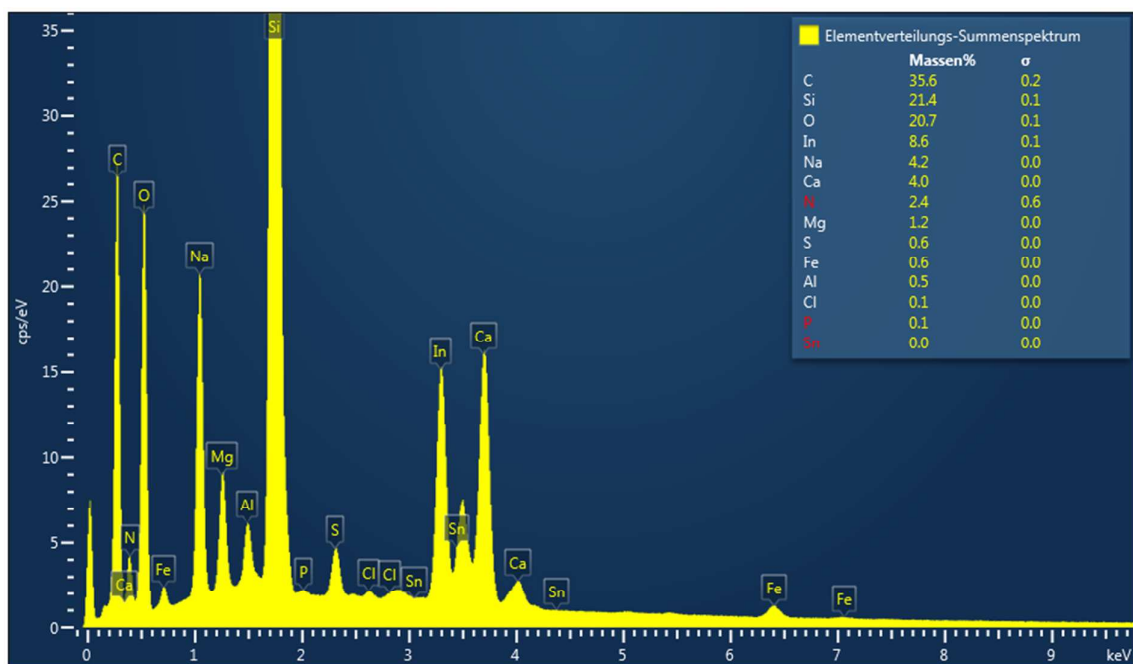

**Figure S11.** Energy-dispersive X-ray (EDX) spectrum of **FeL2-MEPE** film on ITO-coated glass with calculated mass percentages of the detected elements.

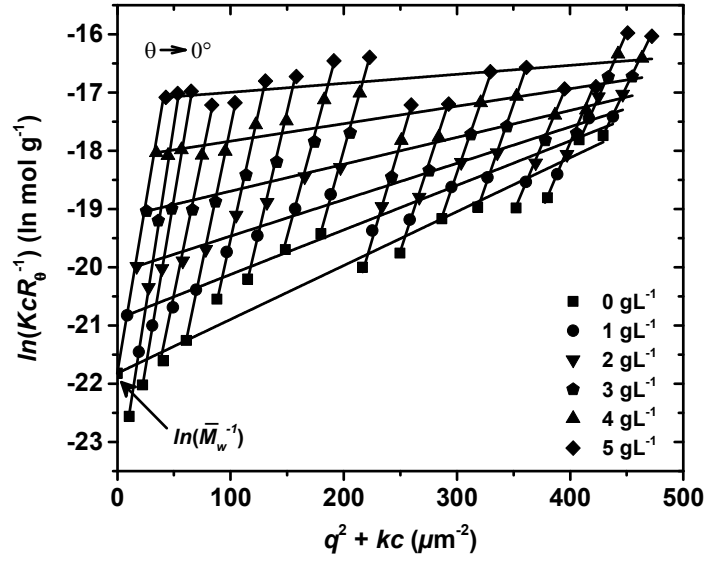

**Figure S12.** Guinier-Zimm plot of **FeL2-MEPE** in ethanol at 23 °C. The Rayleigh ratio,  $R_\theta$ , is measured with respect to five solution concentrations (1 – 5 g L<sup>-1</sup>) and from 16 different angle positions of the detectors, in the range from 20° and 144°. The scaling factor  $k$  of the Zimm plot is set to 8.58 L g<sup>-1</sup> μm<sup>-2</sup>. The  $\ln(kcR_\theta^{-1})$  values are extrapolated to  $\theta \rightarrow 0$ , that is  $q^2 \rightarrow 0$ , and  $c \rightarrow 0$ .

**Theory:** In the static light scattering (SLS), **Fe-MEPE** solutions at different concentrations ( $c = 1 - 5$  g L<sup>-1</sup>) were prepared in order to calculate the weight average molar mass,  $\bar{M}_w$ , and the radius of gyration,  $R_g$ . The intensity of the scattered light depends on the concentration,  $c$ , and the scattering angle,  $\theta$ , which results in different Rayleigh ratios,  $R_\theta$ . The  $R_\theta$  is plotted *via* a Zimm plot according to the equation 1:<sup>1-3</sup>

$$\frac{Kc}{R_\theta} = \frac{1}{\bar{M}_w \left(1 - \frac{1}{3} R_g^2 q^2\right)} + 2A_2 c \quad (1)$$

where,  $A_2$  is the second virial coefficient. The static light scattering measurements were evaluated by extrapolating the  $KcR_\theta^{-1}$  values to an interference-free condition, which is  $\theta \rightarrow 0$ , and leads to the extrapolation of the scattering vector,  $q^2 \rightarrow 0$ . Also, on the other hand the values are extrapolated to an interaction-free condition, which is  $c \rightarrow 0$ . As a result, the

Zimm plot is carried out considering the Guinier's method.<sup>4, 5</sup> Moreover, Guinier and Fournet<sup>4, 6</sup> showed that the scattering vector can be approximated over a wide range of  $q^2$  values by equation 2:

$$1 - \frac{1}{3}R_g^2 q^2 = e^{-\frac{1}{3}R_g^2 q^2} \quad (2)$$

With this approximation, Wesslau<sup>4, 7</sup> proposed the Guinier-Zimm plot based on the equation 3:

$$\ln\left(\frac{Kc}{R_\theta}\right) = \ln\left(\frac{1}{\bar{M}_w \left(e^{-\frac{1}{3}R_g^2 q^2}\right)} + 2A_2 c\right) \quad (3)$$

where,  $\ln(KcR_\theta^{-1})$  is plotted *vs.*  $(q^2 + kc)$ , as shown in Figure S10 for **FeL2-MEPE**.  $k$  is an arbitrary constant, a scaling factor which is freely selectable.

Using the intercept of the extrapolation curve,  $q^2 \rightarrow 0$ , the weight average molar mass,  $\bar{M}_w$ , can be estimated by equation 4:

$$\lim_{\substack{q^2 \rightarrow 0 \\ c \rightarrow 0}} \left( \ln\left(\frac{Kc}{R_\theta}\right) \right) = \ln\left(\frac{1}{\bar{M}_w}\right) \quad (4)$$

The radius of gyration,  $R_g$ , is defined as the squared distance between a point of a polymer and the center of mass,  $r_i$ , and is given by equation 5:

$$\langle R_g^2 \rangle_z = \frac{1}{N} \sum_{i=1}^N |r_i|^2 \quad (5)$$

$R_g$ , can also be obtained from the slope of the extrapolated curve of  $\ln(KcR_\theta^{-1})$  to  $c \rightarrow 0$ :

$$\frac{d\left(\lim_{c \rightarrow 0} \left(\ln\left(\frac{Kc}{R_\theta}\right)\right)\right)}{d(q^2)} = \frac{r_g^2}{3} \quad (6)$$

Also, the second virial coefficient,  $A_2$ , can be estimated from the slope of the extrapolated curve,  $q^2 \rightarrow 0$ :<sup>1, 2, 4</sup>

$$\frac{d\left(\lim_{q^2 \rightarrow 0} \left(\frac{Kc}{R_\theta}\right)\right)}{dc} \cdot k = 2A_2 \quad (7)$$

### **Determination of hydrodynamic radii.**

A dynamic Zimm plot is generated by measuring the diffusion coefficients,  $D$ , and extrapolating the values in the same way as the  $KcR_\theta^{-1}$  values, as shown in the Guinier-Zimm plot (Figure S11), to an interference-free condition, that is  $\theta \rightarrow 0$ , which leads to an extrapolation of the scattering vector,  $q^2 \rightarrow 0$ , and to an interaction-free condition, that is  $c \rightarrow 0$ . The extrapolation leads to the diffusion coefficient,  $D_0$ . Using this  $D_0$ , the hydrodynamic radii,  $R_h$ , is calculated.<sup>1</sup>

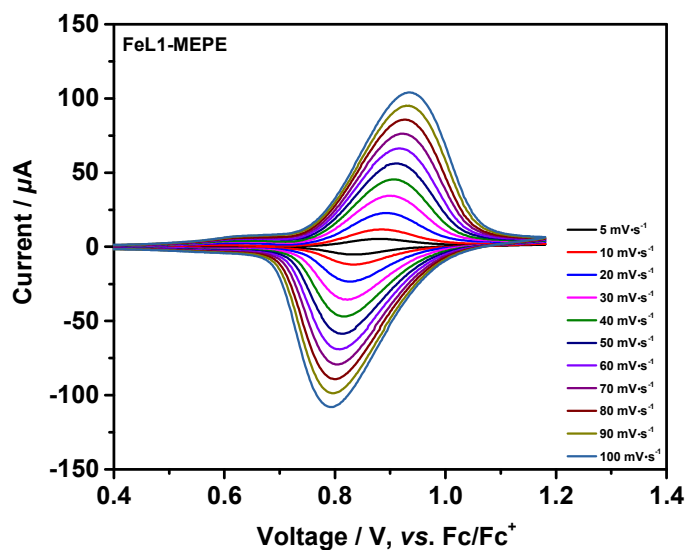

**Figure S13.** Cyclic voltammogram of **FeL1-MEPE** film on ITO-coated glass (dimension: 0.7 cm x 2.5 cm) at different scan rates (5 to 100  $\text{mV}\cdot\text{s}^{-1}$ ) in an electrolyte solution of TBAH (0.2 M) in anhydrous dichloromethane using a platinum wire as counter electrode (CE), and Ag/AgCl as reference electrode (RE).

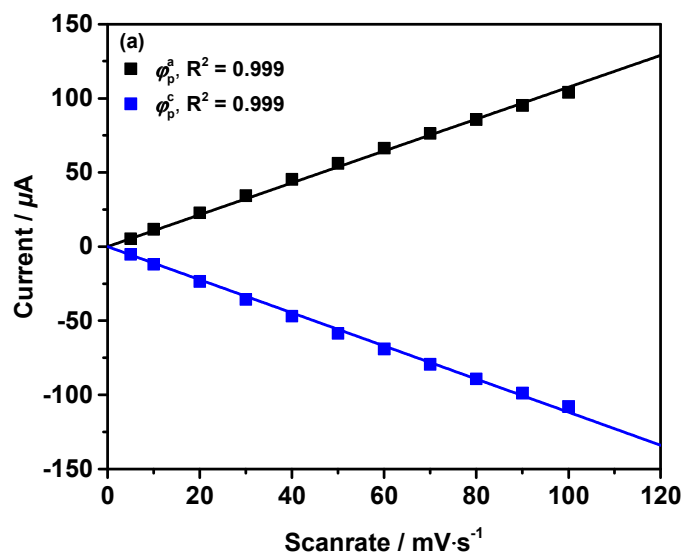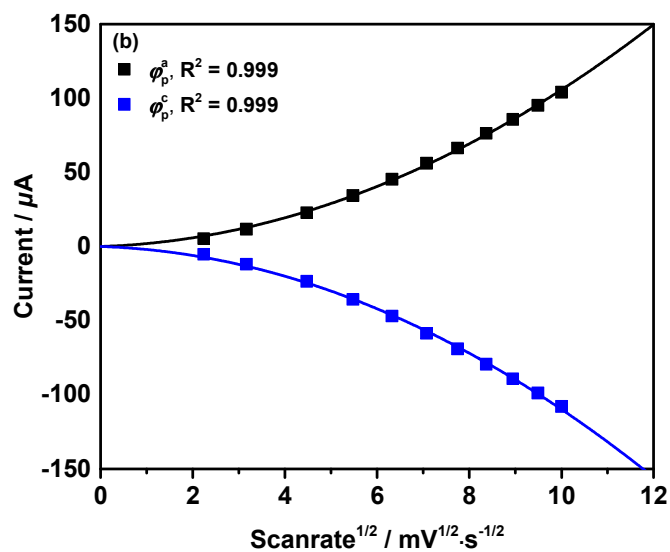

**Figure S14.** (a) Linear increase of the anodic ( $\phi^a$ ) and cathodic ( $\phi^c$ ) peak currents of **FeL1-MEPE** film on ITO-coated glass as a function of scan rate. (b) Anodic and cathodic peak currents of **FeL1-MEPE** film as a function of square root of the scan rate.



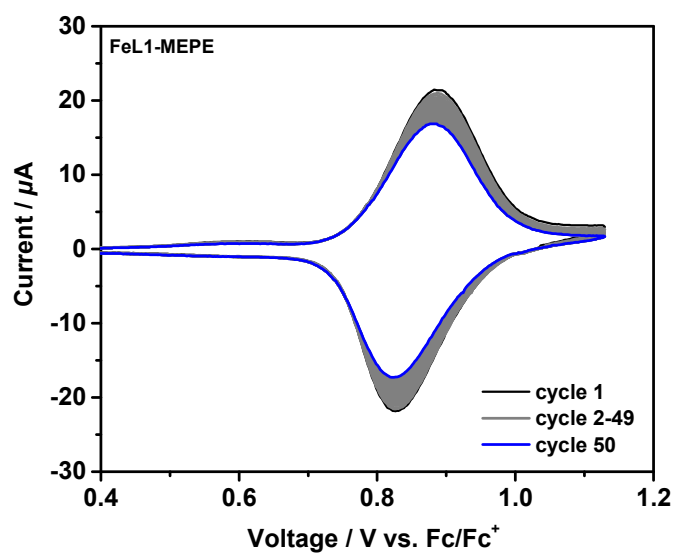

**Figure S15.** Redox stability of **FeL1-MEPE** on ITO-coated glass examined by cyclic voltammetry after 1 (black) and 50 (blue) redox cycles at a scan rate of  $20 \text{ mV}\cdot\text{s}^{-1}$  at room temperature.

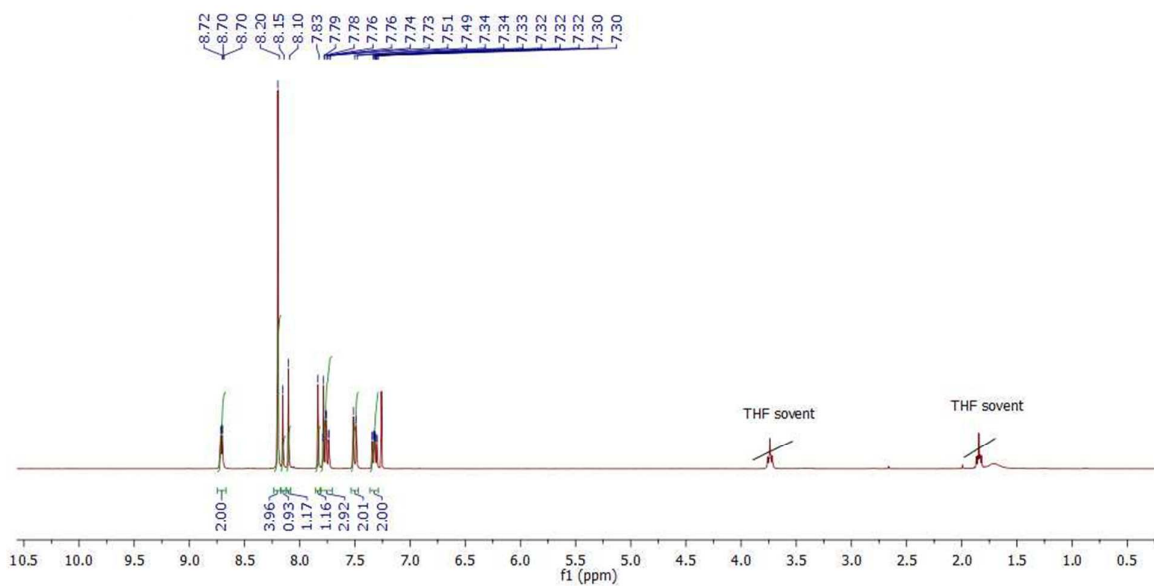

**Figure S16.** <sup>1</sup>H NMR spectrum of compound **4** in CDCl<sub>3</sub>.

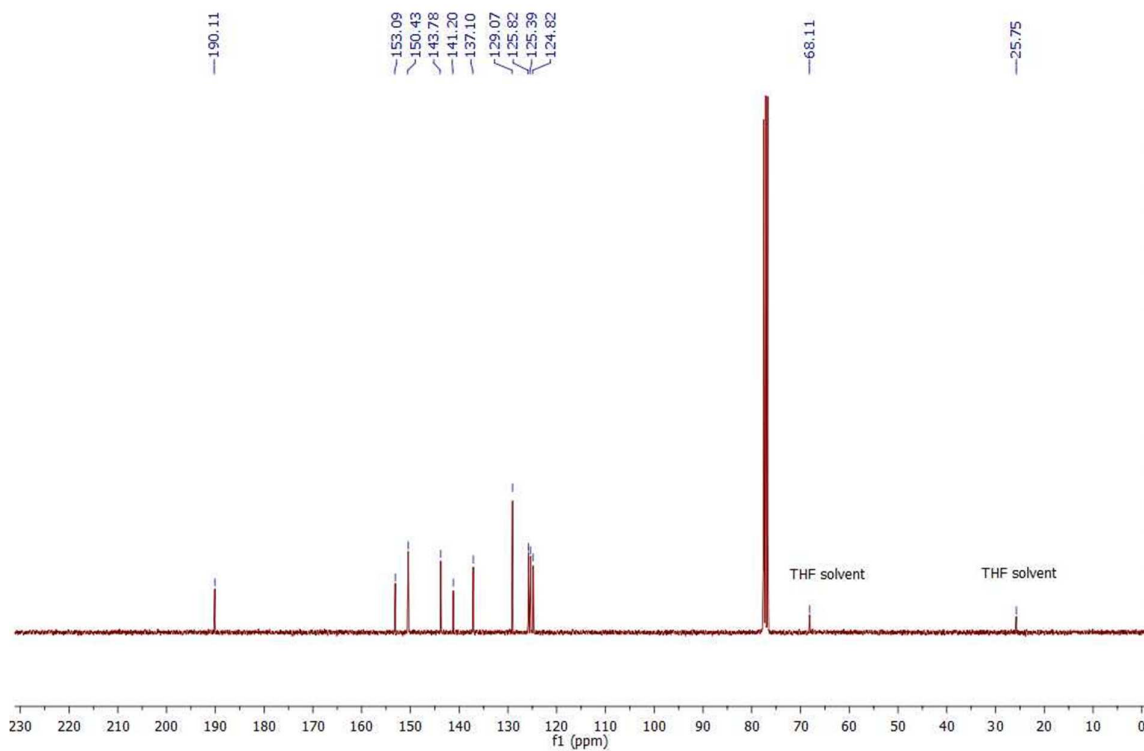

**Figure S17.** <sup>13</sup>C NMR spectrum of compound **4** in CDCl<sub>3</sub>.

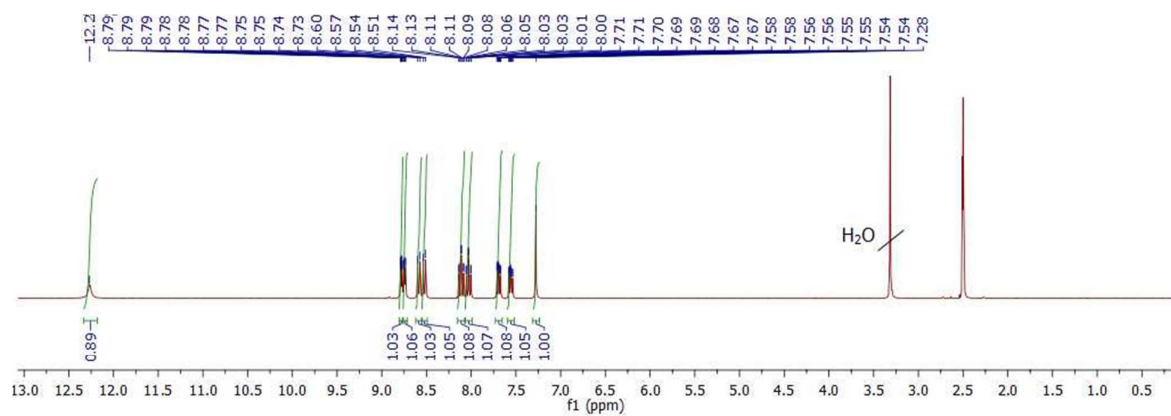

**Figure S18.**  $^1\text{H}$  NMR spectrum of compound 7 in  $\text{DMSO-}d_6$ .

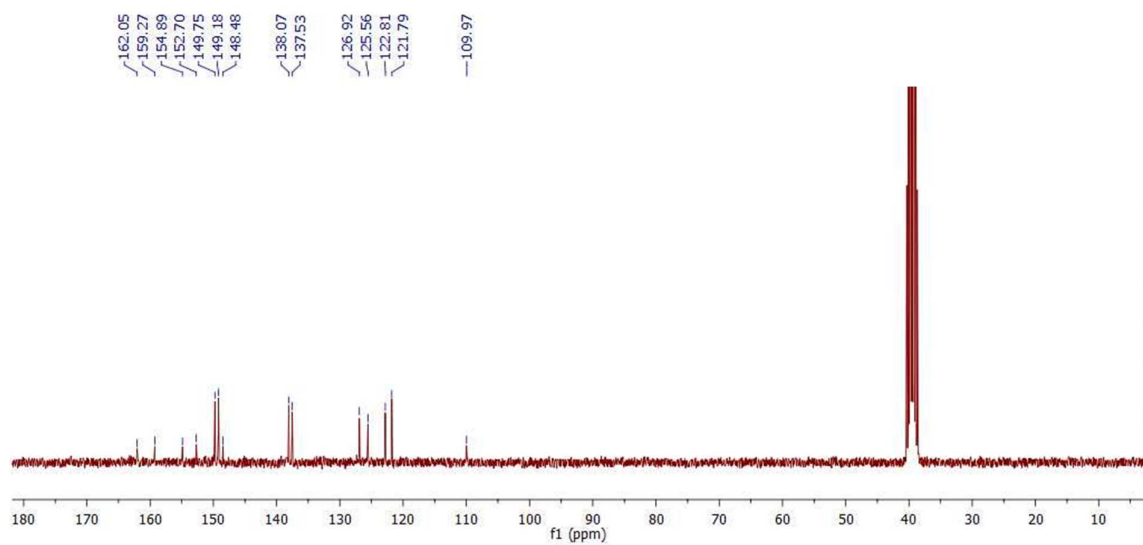

**Figure S19.**  $^{13}\text{C}$  NMR spectrum of compound 7 in  $\text{DMSO-}d_6$ .

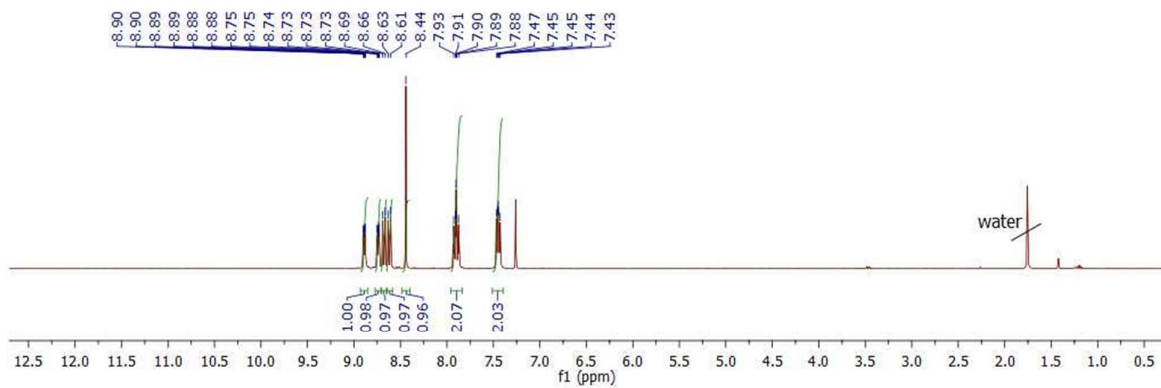

**Figure S20.** <sup>1</sup>H NMR spectrum of compound **8** in CDCl<sub>3</sub>.

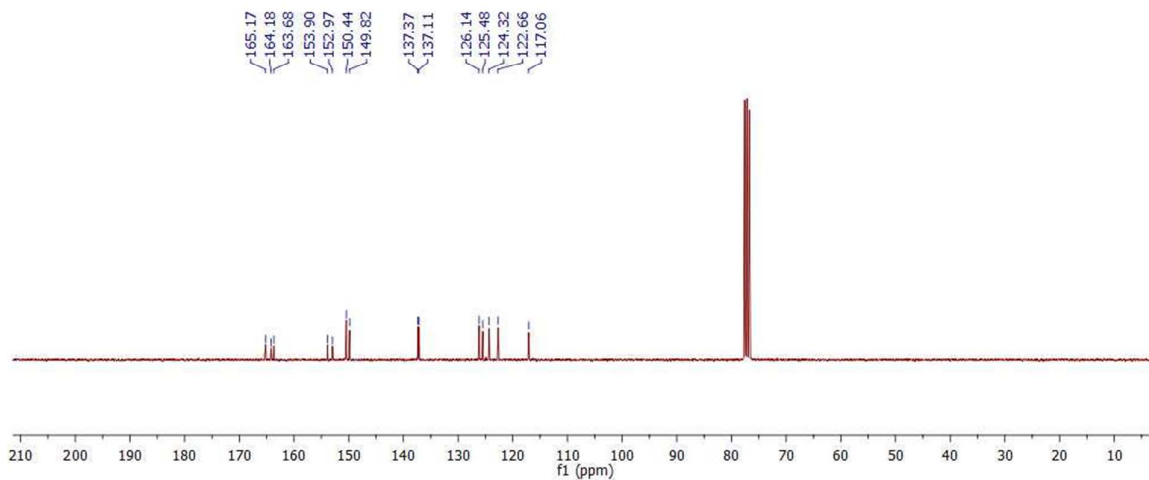

**Figure S21.** <sup>13</sup>C NMR spectrum of compound **8** in CDCl<sub>3</sub>.

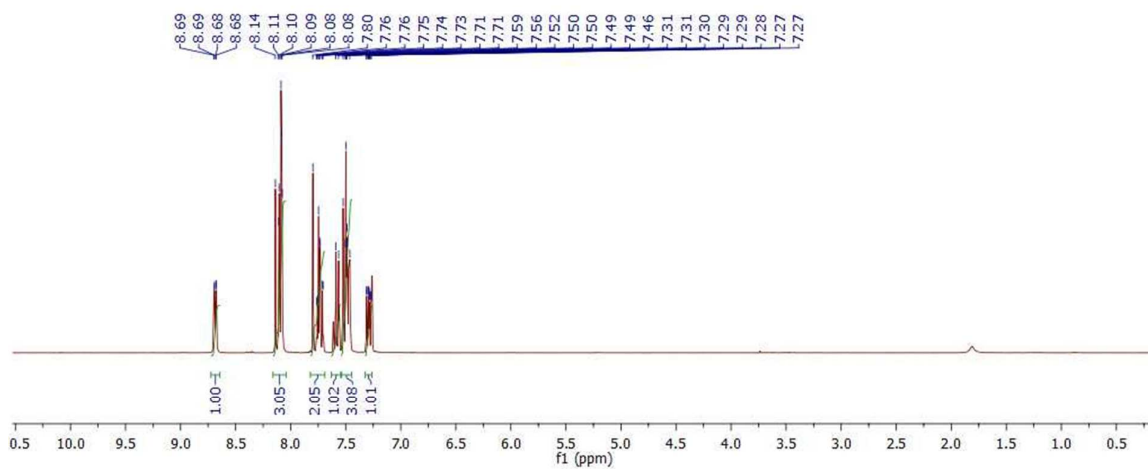

Figure S22. <sup>1</sup>H NMR spectrum of compound **11** in CDCl<sub>3</sub>.

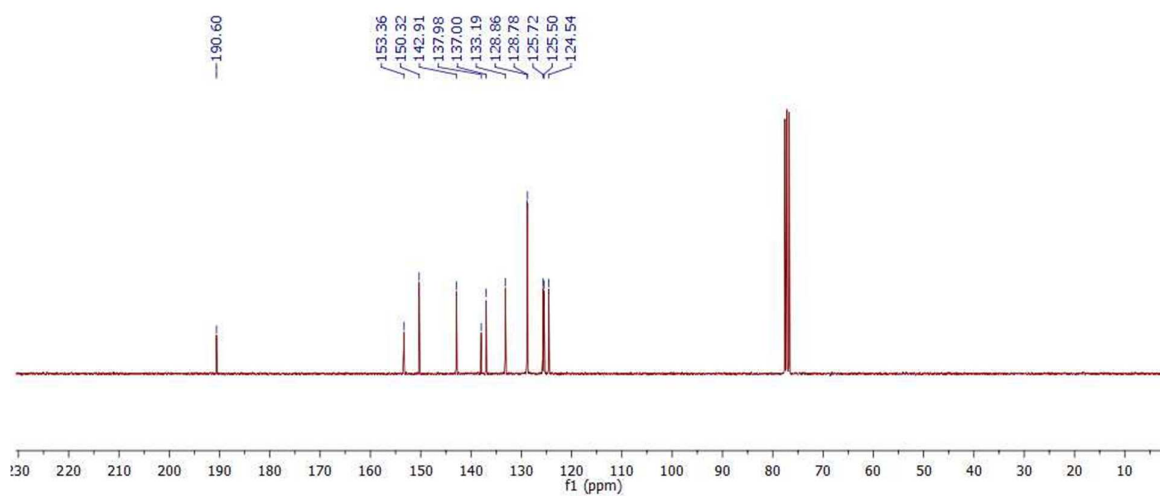

Figure S23. <sup>13</sup>C NMR spectrum of compound **11** in CDCl<sub>3</sub>.

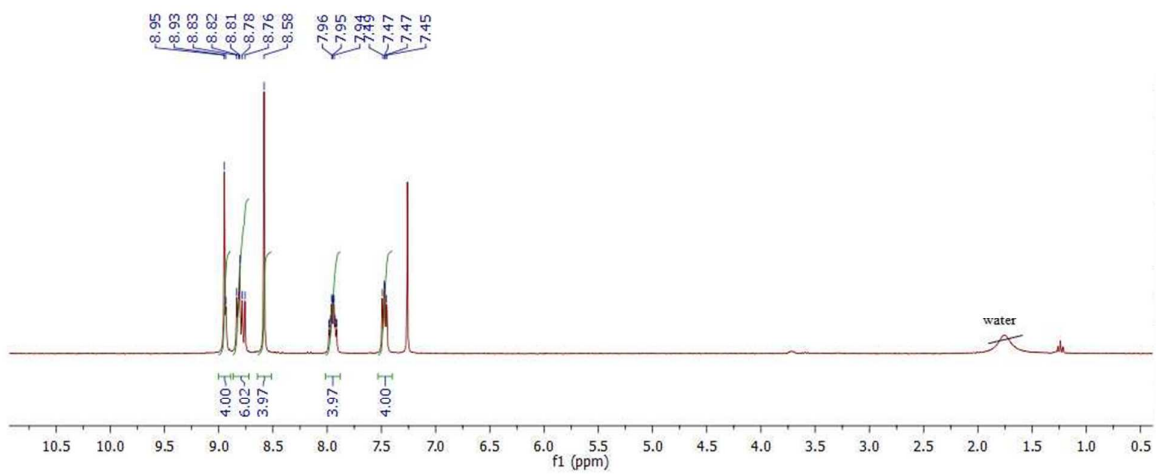

**Figure S24.** <sup>1</sup>H NMR spectrum of ligand L1 in CDCl<sub>3</sub>.

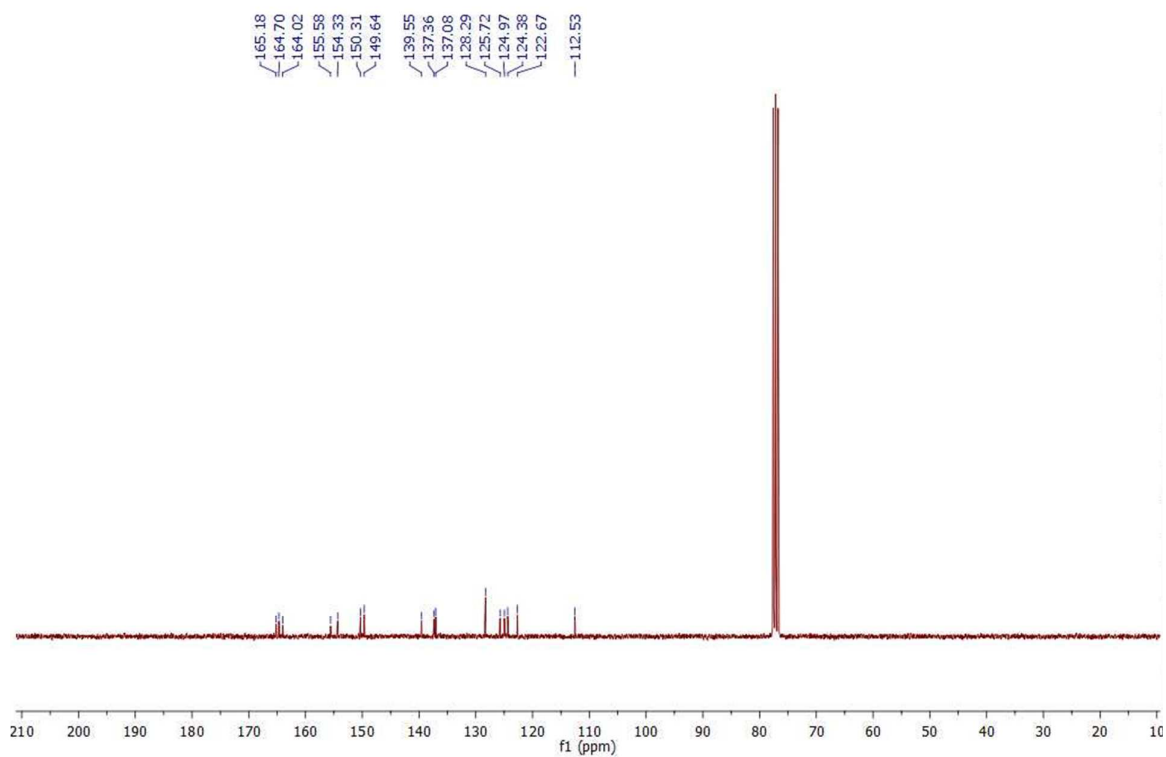

**Figure S25.** <sup>13</sup>C NMR spectrum of ligand L1 in CDCl<sub>3</sub>.

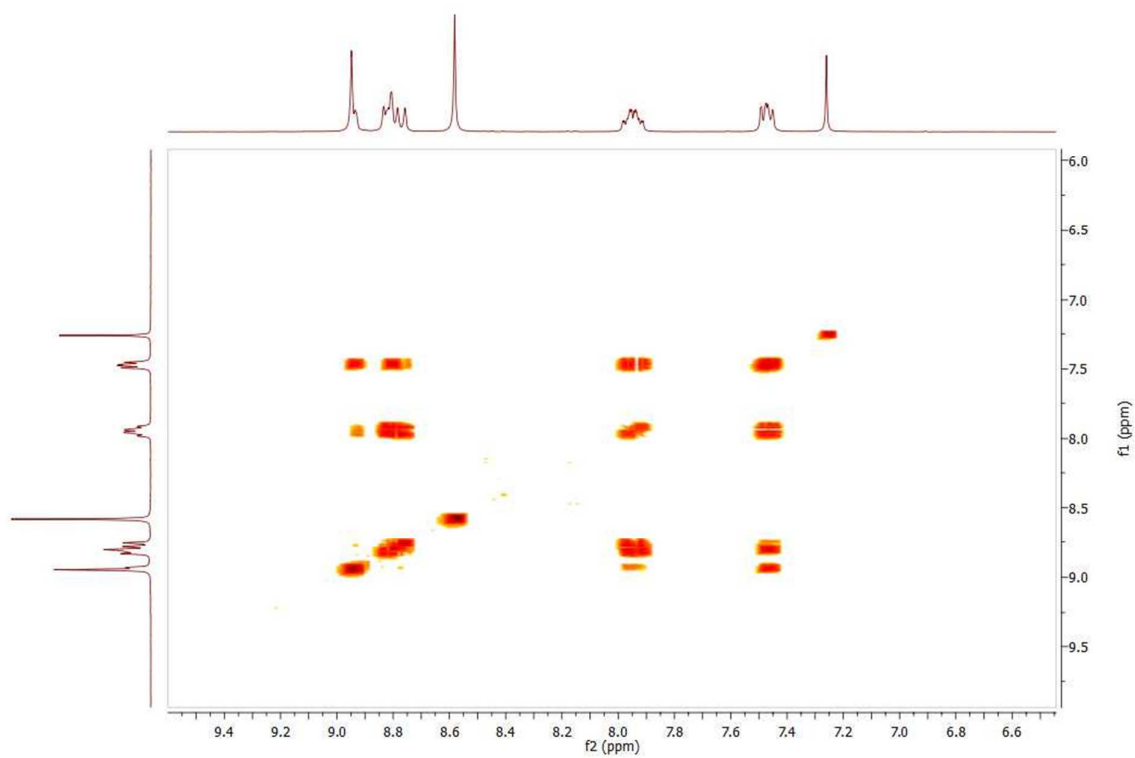

**Figure S26.**  $^1\text{H} - ^1\text{H}$  COSY NMR spectrum of ligand **L1** in  $\text{CDCl}_3$ .

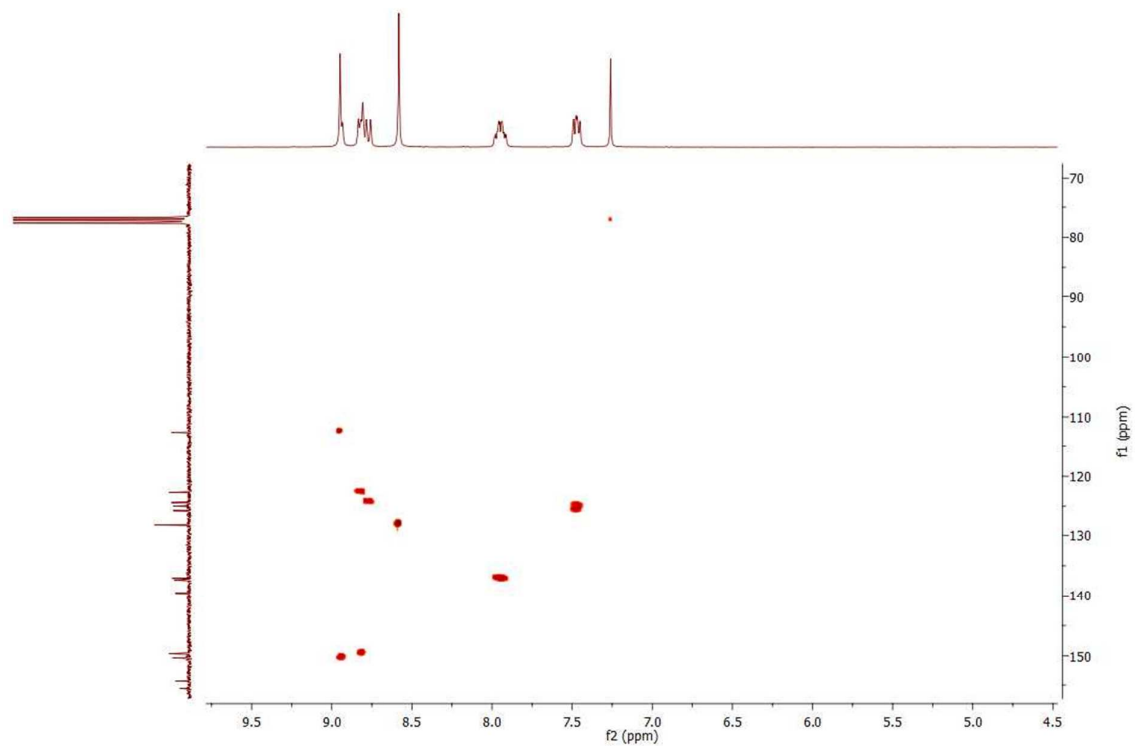

**Figure S27.**  $^1\text{H} - ^{13}\text{C}$  HSQC NMR spectrum of ligand **L1** in  $\text{CDCl}_3$ .

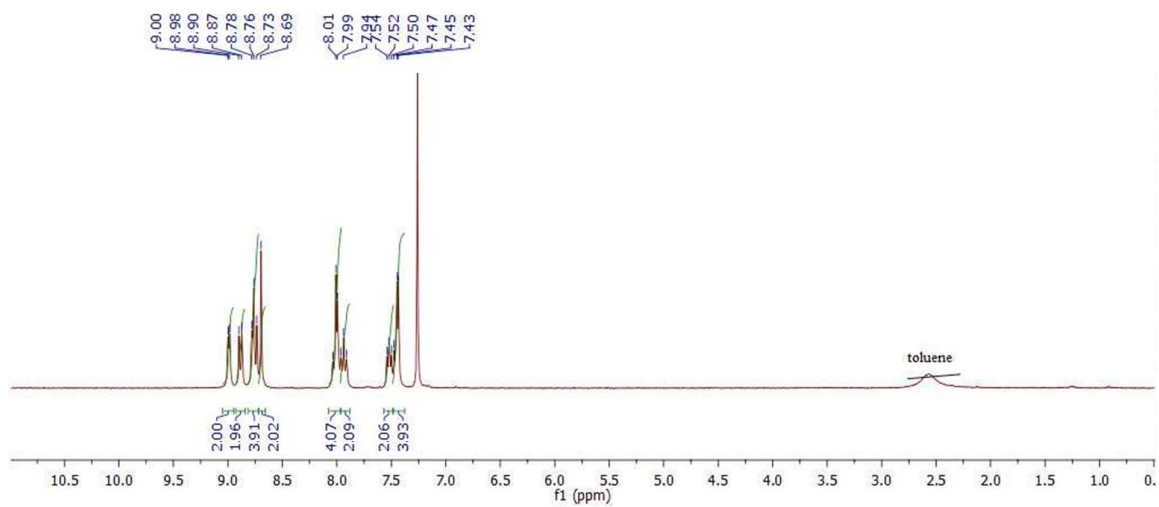

**Figure S28.** <sup>1</sup>H NMR spectrum of ligand L2 in CDCl<sub>3</sub>.

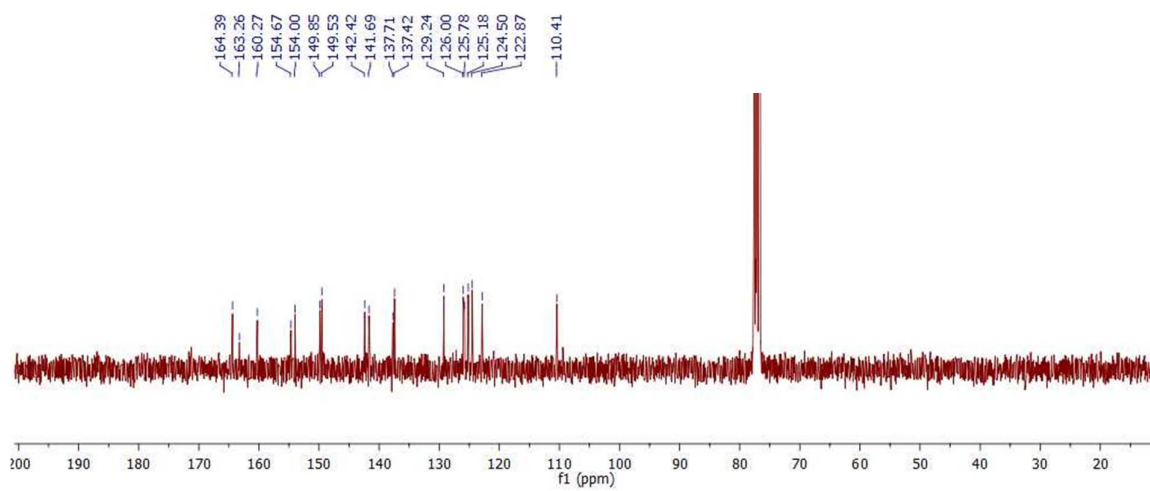

**Figure S29.** <sup>13</sup>C NMR spectrum of ligand L2 in CDCl<sub>3</sub>.



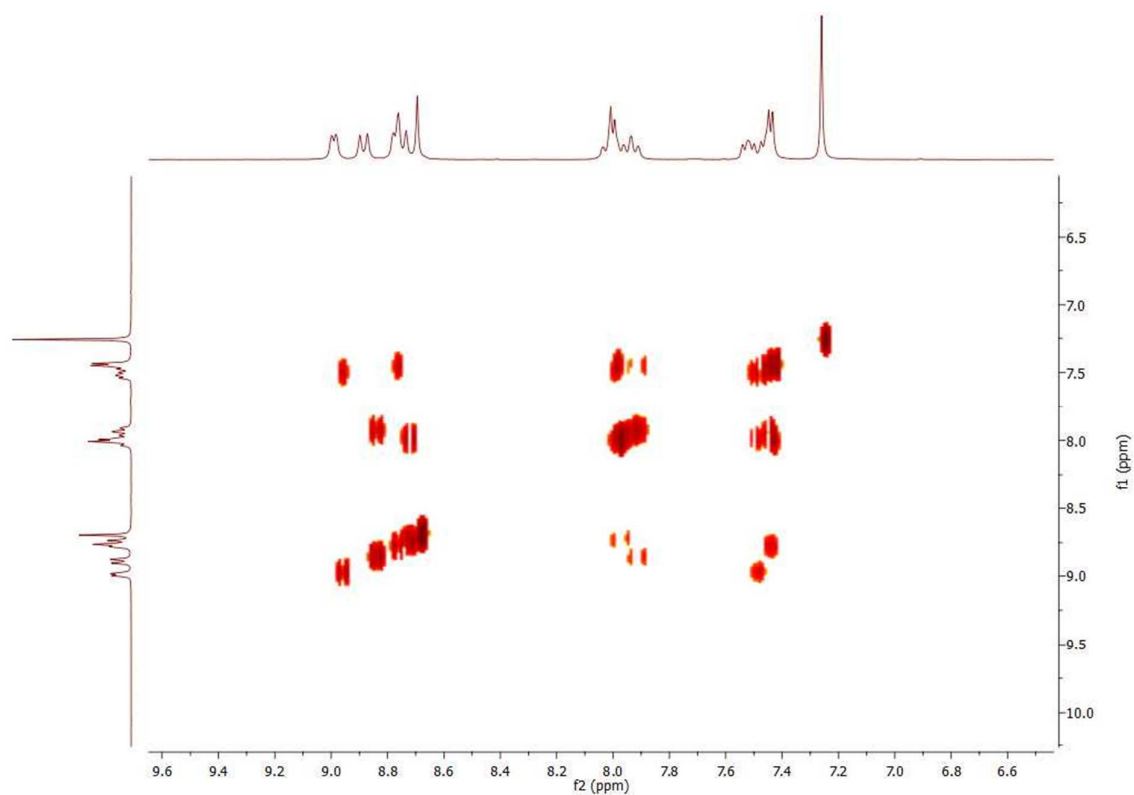

**Figure S30.**  $^1\text{H} - ^1\text{H}$  COSY NMR spectrum of ligand **L2** in  $\text{CDCl}_3$ .

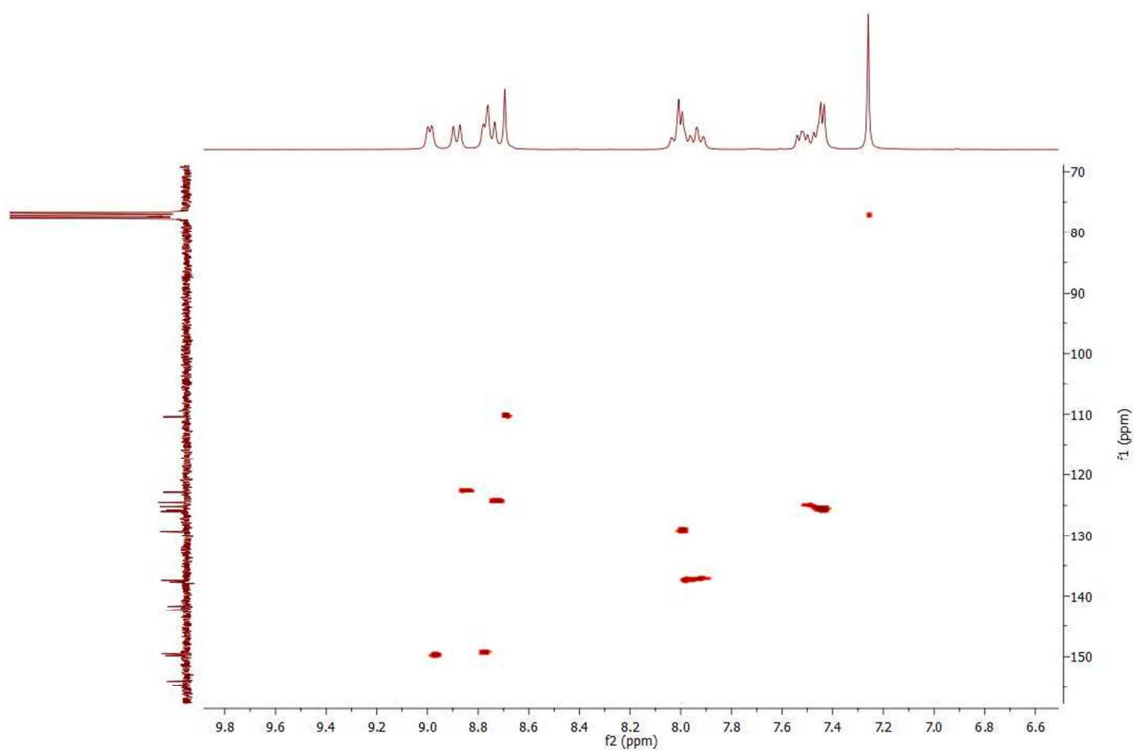

**Figure S31.**  $^1\text{H} - ^{13}\text{C}$  HSQC NMR spectrum of ligand **L2** in  $\text{CDCl}_3$ .

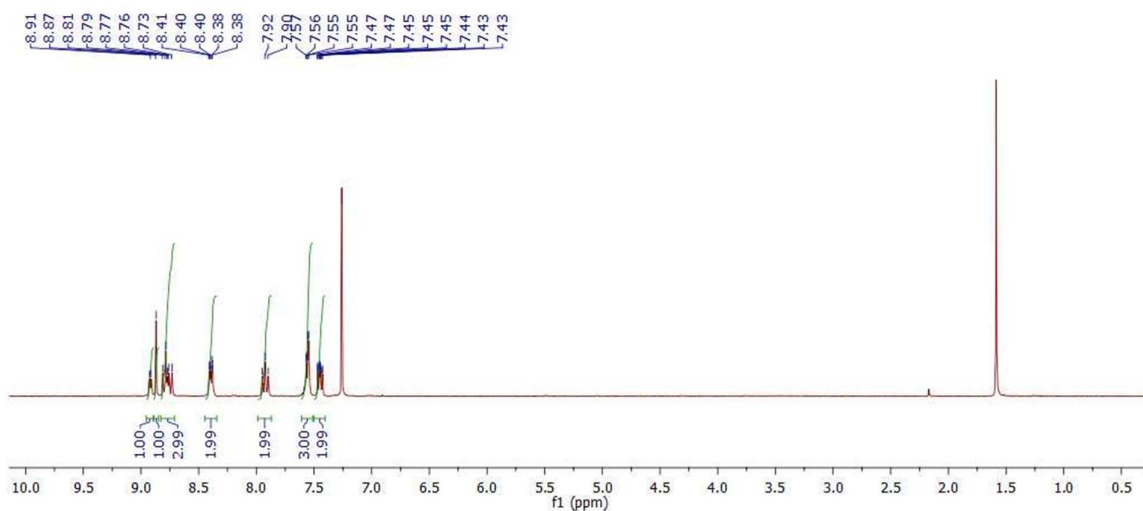

**Figure S32.** <sup>1</sup>H NMR spectrum of ligand L3 in CDCl<sub>3</sub>.

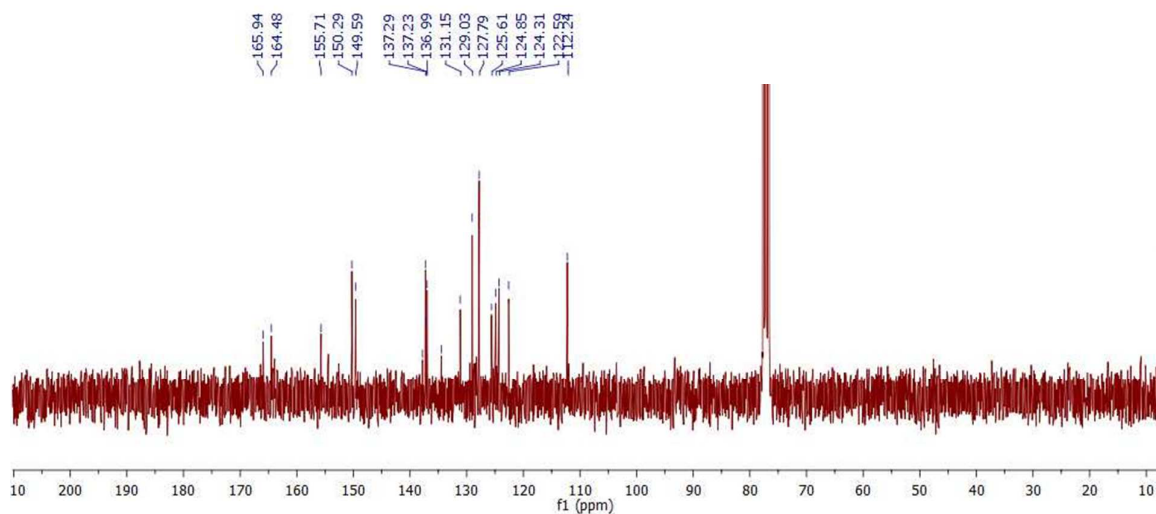

**Figure S33.** <sup>13</sup>C NMR spectrum of ligand L3 in CDCl<sub>3</sub>.

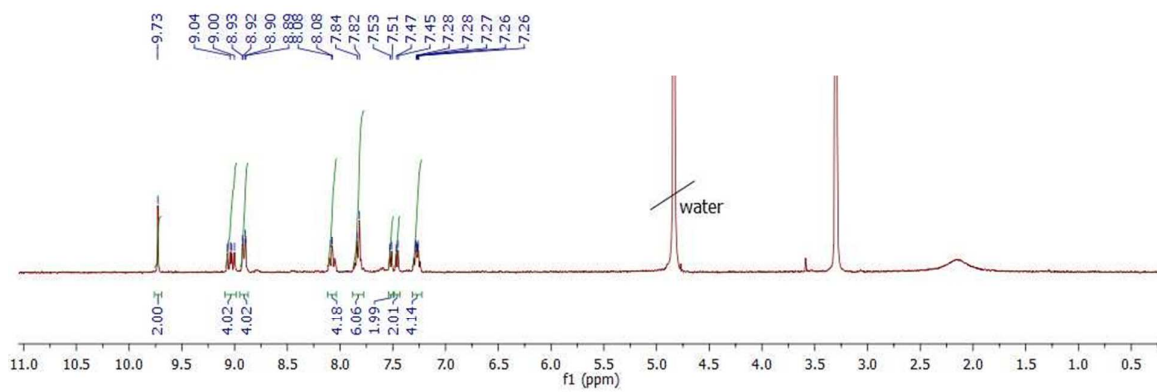

**Figure S34.** <sup>1</sup>H NMR spectrum of FeL3-MC in CD<sub>3</sub>OD.

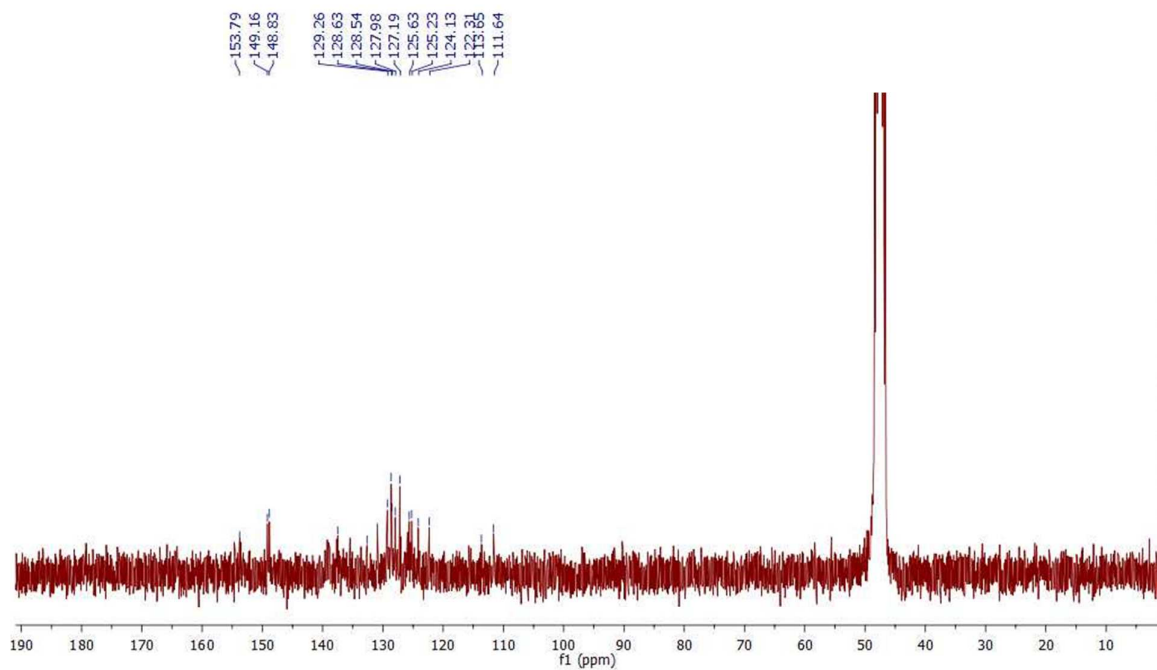

**Figure S35.** <sup>13</sup>C NMR spectrum of FeL3-MC in CD<sub>3</sub>OD.

## References

- (1) Schärftl, W. *Light Scattering from Polymer Solutions and Nanoparticle Dispersions*. Springer Berlin Heidelberg: 2007.
- (2) Arndt, K.-F.; Müller, G. *Polymercharakterisierung*. Carl Hanser Verlag, München Wien: 1996.
- (3) Zimm, B. H. Apparatus and Methods for Measurement and Interpretation of the Angular Variation of Light Scattering; Preliminary Results on Polystyrene Solutions. *J. Chem. Phys.* **1948**, 16, 1099-1116.
- (4) Röder, T.; Morgenstern, B. The influence of activation on the solution state of cellulose dissolved in N-methylmorpholine-N-oxide-monohydrate. *Polymer* **1999**, 40, 4143-4147.
- (5) Burchard, W. In *Light Scattering from Polymers*; Springer Berlin Heidelberg: Berlin, Heidelberg, 1983; Vol. 48, pp 1-124.
- (6) Guinier, A.; Fournet, G. *Small angle scattering of X-rays*. John Wiley & Sons, New York: 1955.
- (7) Wesslau, V. H. Zur kenntnis von acrylsäure enthaltenden copolymerdispersionen. I. Über die auswertung von streulichtmessungen. *Makromol. Chem.* **1963**, 69, 213-219.
